# Supplementary material
Source: Research Square preprint supplement (doi:10.21203/rs.3.rs-9225339/v1)
Supplement: Supplementary file 1 [file c0de42797928ecdbd6c8ff84.docx]

**Supplementary Information**

***Supplementary Table 1*** *HRAM interpretation methods.*

| HRAM interpretation method | Parameters used and normal values* |
| --- | --- |
| Dyssynergia pattern after Rao et al. |  |
| Type I | Adequate rectal pressure increase (> 40 mm Hg) and |
|  | paradoxical increase in anal pressure |
| Type II | Inadequate rectal pressure increase and |
|  | paradoxical increase in anal pressure |
| Type III | Adequate rectal pressure increase and |
|  | failed anal relaxation (<20% relaxation) |
| Type IV | Inadequate rectal pressure increase and |
|  | failed anal relaxation (<20% relaxation) |
| Rome IV criteria |  |
| Inadequate Defecatory Propulsion | Maximum rectal pressure <21/19/22/20 mmHg |
| Dyssynergic Defecation | Inappropriate contraction of the pelvic floor with |
|  | adequate propulsive forces during attempted defecation |
| Dyssynergia after Ratuapli et al. |  |
| High anal | Anal rest pressure > 101/110/100/110 mmHg |
| (high anal pressure at rest and defecation) | Residual anal push pressure > 88/79/99/93 mmHg |
| Hybrid | Maximum rectal pressure <21/19/22/20 mmHg |
| (inadequate rectal propulsive forces and less | Anal relaxation <0% |
| anal relaxation during defecation) |  |
| Low rectal | Maximum rectal pressure <21/19/22/20 mmHg |
| (inadequate rectal propulsive forces) |  |
| Short high-pressure zone (HPZ) | High pressure zone <2.3 cm for females, and <2.4 cm for males) |
| *Normal pressure values are ordered as: | all females/nulliparous females/parous females/males |

***Supplementary Table 2*** *The level of agreement (Cohen’s* κ*) between HRAM- and BD-based DD diagnosis. DD1-DD4 are the four patterns of dyssynergia identified on HRAM, as defined by Rao et al*

|  | Cohen’s | 95% CI | |
| --- | --- | --- | --- |
| Agreement variables | κ | Lower | Upper |
| *Initial interpretation* |  |  |  |
| HRAM - BD | 0.007 | -0.203 | 0.218 |
| *After reassessment* |  |  |  |
| a) Any findings indicative of FDD |  |  |  |
| Any BD finding indicative of FDD |  |  |  |
| HRAM interpretation after Rao | 0.307 | 0.103 | 0.511 |
| HRAM interpretation after Ratuapli | 0.272 | 0.063 | 0.48 |
| HRAM interpretation after Rome IV | 0.294 | 0.116 | 0.471 |
| b) Subgroups |  |  |  |
| *Non-relaxing PR on BD and* |  |  |  |
| HRAM interpretation after Rao | 0.27 | 0.058 | 0.481 |
| HRAM interpretation after Ratuapli | 0.234 | 0.02 | 0.449 |
| HRAM interpretation after Rome IV | 0.315 | 0.117 | 0.513 |
| DD 1 - 3 after Rao | 0.213 | 0.034 | 0.392 |
| Paradoxical anal contraction (relaxation <0%) | 0.154 | -0.007 | 0.315 |
| *Impaired evacuation on BD and* |  |  |  |
| Inadequate rectal propulsion | 0.057 | -0,176 | 0.29 |

***Supplementary Table 3*** *The reevaluated parameters. PARA: posterior anorectal angle; CARA: central anorectal angle; r: rest; e: defecation effort; ACD: anal canal diameter; PD: peritoneal descent*

| Parameter | Missing values | Mean | Std. Deviation | Minimum | Maximum |
| --- | --- | --- | --- | --- | --- |
| Anal relaxation % | 0 | 26 | 31 | -49 | 100 |
| Max rectal pressure, mmHg | 1 | 43 | 27 | 0 | 163 |
| Rectoanal gradient, mmHg | 0 | -2 | 35 | -97 | 118 |
| PARA r, degrees | 0 | 96 | 20 | 50 | 151 |
| PARA e, degrees | 0 | 126 | 25 | 49 | 171 |
| PARA angle change, degrees | 0 | 29 | 24 | -15 | 84 |
| CARA r, degrees | 0 | 125 | 17 | 92 | 160 |
| CARA e, degrees | 0 | 143 | 20 | 94 | 178 |
| CARA angle change, degrees | 0 | 18 | 19 | -20 | 62 |
| ACD, mm | 3 | 13 | 5 | 0 | 23 |
| PD, cm | 1 | 2 | 1 | 0 | 6 |

***Supplementary Table 4*** *The correlations between HRAM and BD parameters. Rho is Spearman’s rank correlation coefficient. * indicates statistical significance. PARA: posterior anorectal angle; CARA: central anorectal angle; r: rest; e: defecation effort; ACD: anal canal diameter; PD: peritoneal descent*

| HRAM parameters | Anal relaxation | | Max rectal pressure | | Rectoanal gradient | |
| --- | --- | --- | --- | --- | --- | --- |
|  |  |  |  |  |  |  |
| BD parameters | Rho | p | Rho | p | Rho | p |
| PARA r | 0.205 | 0.068 | -0.083 | 0.467 | -0.005 | 0.965 |
| PARA e | 0.083 | 0.465 | -0.006 | 0.96 | 0.078 | 0.492 |
| PARA change | 0.205 | 0.068 | 0.092 | 0.419 | 0.15 | 0.184 |
| CARA r | -0.072 | 0.523 | -0.029 | 0.797 | 0.002 | 0.986 |
| CARA e | 0.046 | 0.688 | 0.028 | 0.809 | 0.02 | 0.861 |
| CARA change | 0.183 | 0.103 | 0.091 | 0.427 | 0.079 | 0.484 |
| ACD | 0.082 | 0.481 | 0.009 | 0.941 | 0.051 | 0.658 |
| PD | 0.132 | 0.248 | 0.139 | 0.225 | 0.051 | 0.656 |
